# ANP32A and ANP32B are key factors in the Rev dependent CRM1 pathway for nuclear export of HIV-1 unspliced mRNA

Yujie Wang<sup>1</sup>, Haili Zhang<sup>1</sup>, Lei Na<sup>1</sup>, Cheng Du<sup>1</sup>, Zhenyu Zhang<sup>1</sup>, Yong-Hui Zheng<sup>1,2</sup>, Xiaojun Wang<sup>1\*</sup>

<sup>1</sup>State Key Laboratory of Veterinary Biotechnology, Harbin Veterinary Research Institute, the Chinese Academy of Agricultural Sciences, Harbin 150069, China

<sup>2</sup>Department of Microbiology and Molecular Genetics, Michigan State University, East Lansing, Michigan, USA.

\* Address correspondence to Xiaojun Wang, wangxiaojun@caas.cn.

## Abstract

The nuclear export receptor CRM1 is an important regulator involved in the shuttling of various cellular and viral RNAs between the nucleus and the cytoplasm. HIV-1 Rev interacts with CRM1 in the late phase of HIV-1 replication to promote nuclear export of unspliced and single spliced HIV-1 transcripts. However, the knowledge of cellular factors that are involved in the CRM1-dependent viral RNA nuclear export remains inadequate. Here, we identified that ANP32A and ANP32B mediate the export of unspliced or partially spliced viral mRNA via interacting with Rev and CRM1. We found that double, but not single, knockout of ANP32A and ANP32B, significantly decreased the expression of gag protein. Reconstitution of either ANP32A or ANP32B restored the viral production equally. Disruption of both ANP32A and ANP32B expression led to a dramatic accumulation of unspliced viral mRNA in the nucleus. We further identified that ANP32A and ANP32B interact with both Rev and CRM1 to promote RNA transport and that this function is Rev/RRE-dependent, but not CTE-dependent. Together our data suggests that ANP32A and ANP32B are required for HIV-1 unspliced RNA export in the Rev-CRM1 pathway.

## Author summary

Posttranscriptional regulation of HIV-1 genome is very important for viral protein expression and viral replication. HIV-1 Rev protein bind to RRE structure of viral RNA and interacts with the mammalian nuclear export factor Chromosomal Maintenance 1 (CRM1) in the late phase of HIV-1 replication to promote nuclear export of unspliced and single spliced HIV-1 transcripts. The REV/RRE-CRM1 pathway has been investigated for years and many host factors have been reported to be involved, but the complicated complex and procedure remain largely unknown. Here the authors report that two host proteins, ANP32A and ANP32B, are novel key factors that support export of unspliced and partial spliced viral RNA from the nucleus to the cytosol. ANP32A/B can interact with both Rev and CRM1, and this interaction is necessary for Rev/RRE-CRM1 dependent viral RNA export. These results suggest that ANP32A and ANP32B are important in viral replication and could be potential targets for novel antiviral strategy.

**Key words:** ANP32A; ANP32B; Rev/RRE; CRM1; HIV-1 unspliced mRNA

## 49 Introduction

50 Human immunodeficiency virus type-1(HIV-1) is an enveloped, single strand positive RNA virus belonging  
 51 to the lentivirus family. During HIV-1 replication, the 9 kb genome RNA is reverse transcribed to proviral DNA  
 52 and then processed into RNA with specific splicing schemes to generate multiple species of mRNA: the  
 53 unspliced 9 kb full-length genomic RNA, the 4 kb partially spliced mRNA and the 2 kb completely spliced mRNA  
 54 [1]. The mechanism of export of the unspliced and partially spliced viral RNAs is discrete from the pathway for  
 55 transport of completely spliced mRNA. In the early phase of HIV-1 replication, the current consensus view of  
 56 the completely spliced mRNA is presumably transported into the cytoplasm mediated by the TAP/NXF1 pathway  
 57 to translate the regulatory proteins Rev, Nef, and Tat. The Rev protein of HIV-1, a 116 amino acid accessory  
 58 protein, has a nuclear localization signal (NLS) recognized by importins, and also a leucine-rich nuclear export  
 59 signal (NES) recognized by mammalian nuclear export factor Chromosomal Maintenance 1 (CRM1); it therefore  
 60 shuttles between the nucleus and cytoplasm. Rev can specifically bind to the Rev response element (RRE)  
 61 located in the *env* gene of the unspliced or partially spliced mRNA. In the late phase of HIV-1 replication, with  
 62 Rev accumulation in the nucleus the unspliced or partially spliced mRNAs are exported to the cytoplasm via a  
 63 Rev-CRM1 dependent export pathway to translate all structural viral proteins [2-10].

64 The key factor in the export of viral mRNA is the Rev-CRM1 complex. In the nucleus, the multimerized Rev  
 65 recruits CRM1 through the Rev leucine-rich nuclear export signal (NES) located in the C-terminal domain to  
 66 assemble the ribonucleoprotein complex with Ran-GTP[11-13], thus facilitating its exportation. However, a  
 67 number of host factors (including Matrin-3, DDX1, DDX21, DDX3, DDX5, MOV10, Sam68, and CBP80) have  
 68 been reported to interact with Rev and RRE and help viral mRNA export from the nucleus to the cytoplasm and  
 69 mRNA translation [14-23]. Most of these factors have not been identified as interacting with CRM1. So far there  
 70 are only a few proteins, such as DDX3 and Naf1, that are reported to interact with the Rev-CRM1 complex to  
 71 facilitate viral mRNA export. Whether other cellular proteins are involved in the Rev-CRM1 complex and direct  
 72 the viral RNA export from the nucleus to the cytoplasm remains largely unknown.

73 CRM1 is well known as an important receptor in the nuclear-cytoplasmic transportation of cellular RNA  
 74 complexes and many viral RNAs, and functions by interacting with different cellular proteins through various  
 75 mechanisms [24-27]. In this study, we investigated the functions of two proteins that interact with CRM1,  
 76 ANP32A and ANP32B, during the export of HIV-1 unspliced mRNA from the nucleus to the cytoplasm. The  
 77 ANP32 family member, initially identified as a 32kDa highly conserved acidic (leucine-rich) nuclear

phosphoprotein protein, is characterized by an N-terminal leucine rich repeat (LRR) domain and a C-terminal low-complexity acidic (LCAR) region [28]. It has been suggested that the LRR domains of the ANP32 proteins interact with several proteins, including CRM1 [29], PP2Ac [30], Ataxin-1 [31], Histone H3-H4 [32], and Clip170 [33]. The ANP32 proteins are also ascribed biochemical activities including chromatin modification and remodeling, apoptotic promotion [34], as well as protein phosphatase 2A (PP2A) and histone acetyltransferase (HAT) inhibition [35-37]. It has been shown that ANP32A is an essential host partner co-opted to support influenza virus vRNP polymerase activity, and contributes to the influenza virus host range [38,39]. Furthermore, it was reported that foamy virus nuclear RNA export is dependent on the HuR and CRM1 pathways in which ANP32A and ANP32B act as necessary cofactors [40]. However, whether ANP32A/B involved in the Rev-dependent CRM1 pathways for HIV-1 unspliced RNA nuclear export is unknown.

Here, we created ANP32A and ANP32B knockout HEK293T cell lines to evaluate their functions in HIV-1 RNA export. Our work showed that ANP32A and ANP32B play similar roles and contribute to CRM1-dependent RNA export by interacting with both Rev and CRM1, therefore enhancing viral production and replication.

## Results

### ANP32A and ANP32B are required for HIV-1 gag expression and viral production

ANP32A, encoded on chromosome 15, and ANP32B, encoded on chromosome 9, share 72.7% sequence identity and have similar protein structures, which consist of four acidic leucine-rich domain (LRR) repeats at the N terminal and a low-complexity acidic region (LCAR) located at the C terminal, bridged by a LRRCT domain (Fig 1A). To determine whether human ANP32A and ANP32B could function as cellular co-factors in HIV-1 replication, we analyzed the effect of ANP32A and ANP32B gene knockout on HIV-1 gag expression and virus production. Firstly, two specific sgRNAs were used to generate ANP32A and/or ANP32B gene knocked out cell lines in HEK293T cells using CRISPR/Cas9 technology (Fig 1B). The ANP32A single knockout cell line  $\Delta$ ANP32A (AKO), ANP32B single knockout cell line  $\Delta$ ANP32B (BKO), and the ANP32A/B double KO cell line (DKO) were confirmed by western blotting (Fig 1C). Real time PCR results showed that the mRNA levels of ANP32A in AKO and DKO cells were dramatically reduced, but no reduction in BKO cells comparing with wild type 293T (WT) cells; the mRNA levels of ANP32B in BKO and DKO cells were largely decreased, but no

reduction in AKO cells comparing with WT cells (Fig 1D and E), indicating that ANP32A and ANP32B express independently and one deletion does not affect the expression of the other.

To determine the effect of ANP32A and ANP32B on HIV-1 production, we transfected pNL4-3-lucΔVifΔEnv and VSV-G plasmids into WT, AKO, BKO, and DKO cells and assessed the expression of viral Gag proteins p55 and p24. The results showed that single knockout of either ANP32A or ANP32B has no impact on HIV-1 gag expression, while a significant decrease in p24 in the cytosol and cell culture supernatant was observed in the DKO cells compared with WT, AKO and BKO cells (Fig 1F). This result indicates that both ANP32A and ANP32B are functional and equally contribute to HIV-1 gag expression and either is enough to support the virus protein expression. Furthermore, we confirmed that p24 expression was restored when ANP32A and ANP32B were reconstituted via ectopic stable expression in the DKO cells (Fig 1G). In addition, when ANP32A and ANP32B-expressing plasmids were transfected into DKO cells, the p24 and p55 expression in the cell and cell culture supernatant both increased in a dose-dependent manner (Fig 1H and 1I). All these results demonstrate that either ANP32A or ANP32B is required for HIV-1 gag expression in HEK293T cells.

### **ANP32A and ANP32B enhance the export of unspliced and incompletely spliced transcripts from nucleus to cytoplasm**

To clarify the mechanism by which ANP32A and ANP32B promote HIV-1 gag expression, the potential effect of ANP32A and ANP32B on viral reverse transcripts was investigated. HIV-1 pseudotyped virus was used to infect WT and DKO cells. Twenty-four hours later, total DNA was extracted, and the viral early or late reverse transcripts were quantified by real-time PCR with specific probes. There was no obvious effect or a little increase on either the early or late reverse transcription products in DKO cells (Fig 2A and 2B), indicating that ANP32A and ANP32B are involved in viral replication at the post reverse transcription step.

We then tested the function of ANP32A and ANP32B in viral transcription and transport. HIV-1 pseudotyped virus was used to infect the WT or DKO cells and cellular RNA was collected to analyze the total gag mRNA. Our results showed that total gag RNAs in WT and DKO cells were similar at 12 h post infection, while at 24 and 36 h post infection, levels of viral gag mRNA in DKO cells were about 10-fold lower than in WT cells (Fig 2C). This result suggests the existence of a block to viral RNA processing after RNA generation in DKO cells. ANP32A and ANP32B have been reported to bridge HuR and CRM1 to support FV RNA transport [40] and also

to contribute to cellular RNA transport [29,41]. We next examined whether ANP32A and ANP32B had any effect on HIV-1 unspliced mRNA nucleo-cytoplasmic shuttling. We fractionated the nucleus from the cytosol, and the cytoplasmic and nuclear distributions of HIV-1 unspliced mRNA in WT or DKO cells were analyzed by quantitative PCR at 12 h and 24 h post infection. At 12 h post infection, there is no obvious difference in the distribution of viral RNA between the WT and DKO cells, in that most of the viral RNA in both cell types was located in the nucleus. In contrast, at 24 h post infection, in the WT cells 85% of the RNA was located in the cytoplasm, indicating that the viral RNA was largely exported from the nucleus into the cytoplasm. However, in the DKO cells, most of the unspliced viral RNA had accumulated in the nucleus. As the result of the viral RNA retention in the nucleus, the ratio of transported viral unspliced mRNA vs total RNA in DKO cells at 24 h post infection was very low (Fig 2D). We found that transportation efficiency of viral *gag* mRNA from nucleus to cytoplasm is largely reduced in DKO cells compared with WT (Fig 2E). However, the completely spliced *tat* mRNA is mostly located in the cytoplasm at 24 post infection in both WT and DKO cells. Only slight alteration of the nuclear export of the *tat* mRNA was observed in DKO cells (Fig 2F). Lamin B1 and tubulin protein was used as nuclear and cytoplasmic protein control respectively to assess the purity of the nuclear and cytoplasmic extracts (Fig 2G). This result implied that ANP32A and ANP32B support the transport of unspliced viral mRNA from the nucleus to the cytoplasm.

To better illustrate this phenomenon, we investigated the subcellular distribution of unspliced *gag* transcripts using fluorescence in-situ hybridization (RNA Scope) with RNA probes that specifically target *gag-pol* mRNA. Consistent with the above observations, at 24 h post infection, *gag-pol* mRNA in the WT cells is mostly located in the cytoplasm (Fig 3A), whereas most of the *gag-pol* mRNAs were in the nucleus of the DKO cells (Fig 3B), indicating a defect in the nuclear export of the unspliced transcripts in the absence of ANP32A and ANP32B. The distribution of the *gag-pol* mRNA observed using the DeltaVision OMX 3D structured illumination microscope (3D-SIM) (GE, USA) closely mirrored the confocal microscopy result. It was clearly showed that in the WT cells, the *gag-pol* mRNA RNA is mostly located in the cytoplasm (Fig 3C), but in the DKO cells the unspliced mRNA was retained in the nucleus (Fig 3D). These data suggest that ANP32A and ANP32B contribute to the efficient export of unspliced viral *gag-pol* transcripts from the nucleus to the cytoplasm.

## ANP32A and ANP32B support the transport of Rev/RRE-dependent not CTE-dependent reporter genes

Rev is a nuclear-cytoplasmic shuttling protein and can directly bind to the RRE structure of unspliced and partially spliced HIV-1 RNAs mediating nuclear-cytoplasmic transport. To better understand whether ANP32A or ANP32B is specifically involved in Rev/RRE-dependent mRNA transport, pDM628-luc-RRE ( the Rev-responsive RRE-containing pDM628 plasmid ), or pDM628-luc-4xCTE ( a pDM628 plasmid in which RRE was replaced with four copies of CTE ), was used to investigate the effect of ANP32A and ANP32B on Rev-dependent mRNA distribution (Fig 4A). pcDNA3.1-Rev-HA was transfected into WT and DKO cells with pDM628-luc-RRE or pDM628-luc-4xCTE. At 24 h post transfection, the level of luciferase mRNA was measured with real time PCR. We found that there was no difference in total luciferase mRNA production between WT and DKO cells when either pDM628-luc-RRE or pDM628-luc-4xCTE was transfected individually (Fig 4B and 4C), indicating similar transfection efficiencies and mRNA expression level. However, in the WT cells at 24 h post transfection, the RRE containing luciferase mRNA was mainly located in the cytoplasm, while in the DKO cells, a significant amount of the mRNA had accumulated in the nucleus (Fig 4D). No difference was observed between WT and DKO cells transfected with pDM628-luc-4xCTE, in which the mRNAs were exported at similar level (Fig 4E).

Meanwhile the RNA distribution was visualized using the RNA Scope technology to confirm this conclusion. The pDM628-luc-RRE mRNA mostly located in the cytoplasmic in the WT cells whereas it was predominantly located in the nucleus in DKO cells (Fig 4F). An analysis of cellular distribution of the pDM628-luc-4xCTE mRNA suggested that the pDM628-luc-4xCTE mRNA was located both in the cytoplasm and the nucleus, and no obvious difference was observed between WT and DKO cells (Fig 4F). These data demonstrate that ANP32A and ANP32B can specifically support the Rev/RRE-dependent RNA export, but not that of CTE-dependent reporter genes.

### **ANP32A and ANP32B interact with Rev**

To confirm the interaction of ANP32A and ANP32B with Rev, Rev-HA was transfected into HEK293T cells with ANP32A-Flag or ANP32B-Flag and the formaldehyde cross-linking immunoprecipitates [42,43] were analyzed by Western blotting in 24 hs. The result showed that both ANP32A and ANP32B co-immunoprecipitate with Rev protein (Fig 5A). To further confirm the interaction between ANP32 proteins and Rev, a bimolecular fluorescence complementation (BiFC) assay was used. In our research, the function of ANP32B is similar to ANP32A, so in



the BiFC assay we just detected the interaction between ANP32A and Rev. This assay enables direct visualization of protein interaction and the subcellular location in living cells. The BiFC assay is based on the finding that two non-fluorescent fragments of a fluorescent protein can associate to produce a significantly brighter fluorescent signal, and that a fluorescent signal can still be obtained if the association of the fragments is adjacent, for example if they are fused to specifically interacting partners. N-terminal residues 1-173 (VN) and C-terminal residues 174-239 (VC) of Venus were fused to the C-terminus of ANP32A and Rev protein, respectively (Fig 5B). When ANP32A-VN or Rev-VC was transfected individually into HEK293T cells, the ANP32A-VN is located in the nucleus and Rev protein is located in the nucleus and cytoplasm (Fig 5C). The Venus signal was observed in both the cytoplasm and nucleus only when ANP32A-VN and Rev-VC were co-transfected into HEK293T cells compared with single transfection of ANP32A-VN or Rev-VC (no Venus signal) (Fig 5D). This result demonstrates that ANP32A and Rev can interact in the cells and shuttles between nucleus and cytoplasm. Meanwhile, robust BiFC signals were also produced from the ANP32A-VN/ANP32A-VC and Rev-VN/Rev-VC pairs, confirming ANP32A oligomerization mostly in the nucleus and Rev homodimerization in the nucleus and cytoplasm [10,44] (Fig 5D). Thus, together, these data indicate that both ANP32A and ANP32B can specifically interact with Rev and shuttle between the cytoplasm and the nucleus.

## **ANP32A and ANP32B play key role in the CRM1 dependent RNA export pathway**

HIV-1 Rev/RRE dependent mRNA transport relies on the CRM1 export pathway. We investigated whether ANP32A and ANP32B interact with CRM1. To do this, we overexpressed ANP32A-Flag or ANP32B-Flag, either with or without a CRM1 express vector (CRM1-HA), into HEK293T cells. Formaldehyde cross-linking immunoprecipitants with HA beads were performed. The result showed that both ANP32A and ANP32B co-immunoprecipitated with CRM1 (Fig 6A). By confocal imaging analysis, we found that either ANP32A or ANP32B protein can co-localized with CRM1 in the nucleus and perinuclear region (Fig 6B). To further confirm this interaction, we performed a BiFC assay to identify and characterize the CRM1-ANP32A interaction. We observed that ANP32A interacted with CRM1 at the nuclear periphery, and to a lesser extent in the nucleus and cytoplasm at 24 h post transfection when CRM1-VN and ANP32A-VC were co-transfected into HEK293T cells (Fig 6C). These results confirm that ANP32A and ANP32B interact with CRM1 proteins.



Next, to investigate whether transport of the complex formed of Rev and ANP32A depends on the CRM1 nuclear export pathway, leptomycin B (LMB), a specific inhibitor that covalently binds to cys528 of CRM1 was used to block CRM1 mediated export from the nucleus [45]. We found that with LMB treatment, not only was HIV-1 unspliced mRNA transportation from the nucleus to the cytoplasm significantly inhibited (Fig 6D), but also the Rev-ANP32A complex was retained in the nucleus (Fig 6E). These results demonstrate that the Rev/RRE-ANP32A complex needs to interact with CRM1 for export of the RNA. Combining these results with those illustrated in Figures 2 and 3, we propose that Rev hijacks ANP32A or ANP32B, either one of which is indispensable for the complex, and that these proteins together function to export viral RNA from the nucleus.

To further clarify the roles of ANP32A and ANP32B in the CRM1 dependent RNA export pathway, pNL4-3-lucΔVifΔEnv were used to transfect both WT and DKO cells either with or without LMB treatment. We found that in the WT cells, LMB treatment significantly decreased the efficiency of HIV-1 gag expression. Interestingly, in the DKO cells, with the p55 expression largely reduced, the LMB treatment had little impact on the gag expression (Fig 6F), indicating that the ANP32A and ANP32B proteins are major determiners of RNA export. The above data imply that the RRE/Rev-ANP32A/B complex engages with the nuclear membrane protein CRM1 for transportation from the nucleus to the cytosol. Taking all this together, we can conclude that ANP32A and ANP32B are key cofactors of Rev, and that they mediate export of unspliced or partially spliced viral RNA through interactions with CRM1.

In the nucleus, Rev protein binds to the RRE and interacts with CRM1, facilitating nuclear export of viral RNAs. In the above result, we confirmed that ANP32A/B interact with Rev and CRM1 protein. To determine the functional relationship between ANP32A/B and Rev-CRM1 nuclear export pathway, we investigated whether the ANP32A/B deletion influence the interaction between Rev and CRM1. 293T WT and DKO cells were co-transfected with FLAG-tagged Rev with or without HA-tagged CRM1, co-IP experiments were performed in 24 hours. Cell lysates were formaldehyde cross-linking immunoprecipitated with an anti-HA beads, followed by western blotting. The result showed that either in the WT or DKO cells Rev protein interacts with CRM1 (Fig 7A). The result was confirmed by the BiFC assay (Fig 7B). This data demonstrated that deletion of ANP32A/B impaired CRM1/Rev/RRE dependent RNA transport without disruption of the interaction between Rev and CRM1. Together, we proposed ANP32A or ANP32B as a previously unrecognized cofactor in the CRM1-mediated Rev nuclear export pathway. ANP32A and ANP32B interact with Rev and CRM1 to support the HIV-1 unspliced RNA transport from nucleus to cytoplasm.

245

## 246 **Discussion**

247 Synthesis of viral structural components from full-length unspliced mRNA is a critical step in the production of  
 248 viral progeny during HIV-1 replication. The HIV-1 Rev protein plays a key role in the nuclear export of unspliced  
 249 and incompletely spliced viral RNA containing the RRE structure [46,47]. The N-terminal domain of Rev binds  
 250 directly with the RRE structure on the unspliced viral RNA, and the C-terminal domain of Rev binds to CRM1,  
 251 therefore enabling the transportation of the RNA. Here we use a double knock out of ANP32A and ANP32B,  
 252 generated using the CRISPR/Cas9 system, to provide novel evidence that the cellular factors ANP32A and  
 253 ANP32B are both functional and essential components in the production of HIV-1. ANP32A and ANP32B bind  
 254 to Rev and CRM1 and support the nuclear export of unspliced and partially spliced mRNA. Furthermore, our  
 255 studies show that inhibition of the function of CRM1 or deletion of ANP32A and ANP32B, impaired unspliced  
 256 viral RNA export and HIV-1 production. All these results demonstrated that ANP32A and ANP32B play an  
 257 important role in HIV-1 production and presumably are key members of the Rev-CRM1 RNA export complex.

258 The evolutionarily conserved ANP32 family of proteins is characterized by an N-terminal variable number  
 259 leucine rich repeat domain (LRR) and a C-terminal acidic tail [28,48]. ANP32A and ANP32B share a highly  
 260 conserved structure. Recent study has showed that chicken ANP32A is a major host factor affecting avian  
 261 influenza viral polymerase activity in human cells [38]; ANP32B can function as a target of the M protein of  
 262 henipavirus to support virus replication [49]. Moreover, ANP32A and ANP32B act as necessary cofactors in the  
 263 export of nuclear RNA of foamy virus without a Rev-like protein [40]. The CRISPR/Cas9 system and siRNA  
 264 screen approaches enable us to achieve a clear background of certain protein express and have allowed the  
 265 identification of various host co-factors that mediate HIV-1 replication [50,51]. In this study, we found that double,  
 266 but not single, deletion of ANP32A and ANP32B using the CRISPR/Cas9 system in an HEK293T cell line  
 267 significantly decreases HIV-1 production and export of unspliced viral RNA. Reconstitution of ANP32A or  
 268 ANP32B restores the gag expression. This result indicates that both ANP32A and ANP32B function similarly  
 269 and contribute equally to the export of viral RNA.

270 Many host factors have been reported to involve in the Rev dependent viral RNA export. Rev interacts with  
 271 transport receptor CRM1 and other host factors, including Ran-GTP, DDX3, RMB14, and Naf-1, to facilitate  
 272 RNA export [11,22,52,53]. Certain proteins have been identified that bind not only to Rev, but also to CRM1.

Examples include the *nal-1* protein, which can interact with CRM1 to enhance mRNA nuclear transport and HIV-1 virus production [53]; RBM14, which interacts with CRM1 and Rev protein and supports Rev-mediated export of unspliced viral transcripts [19]; and UPF1, which is required in the regulation of vRNA nuclear export and which shuttles between the nucleus and the cytoplasm to form a multimeric complex containing UPF1, DDX3, CRM1 and Rev protein[54]. There are also some factors such as Sam68, matrin 3, and DDX1, that interact with Rev and enhance export of viral RNA without evidence of binding to CRM1. Sam68 expression is required for Rev function by directly regulating the CRM1-mediated Rev nuclear export pathway but Sam68 itself does not actively shuttle between the nucleus and the cytoplasm [18,55,56]. The nuclear matrix protein matrin 3 is shown to interact with Rev protein and bind Rev/RRE-containing viral RNA to increase cytoplasmic expression of these viral RNAs [57,58]. DDX1 is known to physically interact with both Rev and the RRE and it can act through RNA to promote HIV-1 Rev-RRE assembly [20,59]. Our results showed that ANP32A/B can bind to Rev and CRM1. Rev-ANP32A/B and CRM1-ANP32A/B interactions could be detected both in the nucleus and in the cytosol. Without ANP32A and ANP32B, hardly any *gag* mRNA was detected in the cytoplasm. From these results, we propose a key role of ANP32A/B proteins in the Rev/RRE-CRM1 RNA export pathway (Fig 8).

The mechanism of function of the Rev protein, and the details of transport of RNA need further investigation. In our work, using RNA Scope technology, we found that without either ANP32A or ANP32B, most of the *gag* mRNA is restricted to the nucleus. Moreover, to confirm our conclusion, we used a pDM628-luc-RRE or pDM628-luc-4xCTE reporter system, and the result demonstrated that either ANP32A or ANP32B was required for the function of Rev-RRE dependent nuclear transport but not CTE-mediated export, similar to finding for DDX3 and UPF1[22,54]. In addition, we evaluated the contribution of CRM1 and ANP32A/B in HIV-1 Rev dependent RNA transport. We found that blocking of CRM1 by LMB dramatically reduces *gag* expression in WT 293T cells, which is consistent with results from previous studies. Surprisingly, in DKO cells, HIV-1 has a low-level of virus production ability and inhibition of CRM1 by LMB showed only a slight reduction in viral replication (Fig 6F). This result indicated that without ANP32A/B, the CRM1-mediated export pathway for HIV-1 RNAs was blocked. Thus, all our experiments appear to support the conclusion that either ANP32A or ANP32B is required to facilitate nuclear export of HIV-1 RNA through the Rev/CRM1 pathway.

We have observed that viral unspliced RNAs at 24h post infection was predominantly located in the nucleus in the DKO cell while most of it has transported to the cytoplasm in the WT cells. Over accumulation of the RNA

in the nucleus presumably blocked the process of RNA synthesis. In our study, we found that total *gag* RNA is significantly lower compared with WT (Fig 2C). Whether nuclear retention is accompanied of degradation or over splicing of the unspliced mRNA needs to be investigated.

In summary, we found that ANP32A and ANP32B are essential host factors supporting HIV-1 virus production. ANP32A and ANP32B specifically interact with Rev/RRE and CRM1 and both contribute to the export of HIV-1 unspliced RNA. The mechanism of how ANP32A and ANP32B function in the Rev/RRE-CRM1 complex needs further investigation.

## Materials and methods

### Cell lines

Human embryonic kidney HEK293T (ATCC CRL- 3216) and HeLa cells (ATCC CCL-2) were maintained in Dulbecco's modified Eagle's medium (DMEM, Gibco) with 10% fetal bovine serum (FBS; Sigma), 1% penicillin and streptomycin (Gibco), and kept at 37°C with 5% CO<sub>2</sub>. HEK293T cells were used to generate ANP32A and ANP32B gene knockout cells using CRISPR/Cas9 technology. Briefly, we designed the gRNA sequence from the gRNA design tool (<http://crispr.mit.edu/>) and inserted it into the pMD18-T backbone vector which contains the U6 promoter, gRNAs specific for host factors, a guide RNA scaffold, and a U6 termination signal sequence. Then the Cas9-eGFP expression plasmid (pMJ920) (provided by Jennifer Doudna) was co-transfected together with gRNA expression plasmids into HEK293T cells. GFP-positive cells were sorted by fluorescence-activated cell sorting (FACS) and cloned by limiting dilution. The positive clones were screened by Western blotting. Single knockout (KO) cell lines  $\Delta$ ANP32A (AKO) and  $\Delta$ ANP32B (BKO), and double KO cell line (DKO) were successfully generated. Stable cell lines expressing human ANP32A and human ANP32B in DKO cells, named DKO+A, DKO+B, were generated through retroviral transduction. Briefly, HEK293T cells in 6-well plates were transfected with 2.0  $\mu$ g pLPCX, 2.0  $\mu$ g pCGP and 0.25  $\mu$ g VSV-G expression plasmids by Lipofectamine® 2000 Transfection Reagent with recommended protocols as described previously[60]. The pseudotype MLV virus expressing the ANP32 protein was harvested 48 h after transfection and used to infect the DKO cells. Positive cells were sorted using puromycin (1  $\mu$ g/ml).

## 329 **Plasmids**

330 The HIV-1 luciferase (Luc) reporter proviral vector pNL4-3-luc $\Delta$ Vif $\Delta$ Env was a gift from Dr Yong-Hui Zheng in  
331 Michigan State University. The pCAGGS plasmids containing human ANP32A and ANP32B were kindly  
332 provided by Dr. Wendy S. Barclay. The human CRM1 gene was cloned from cDNA and inserted into a  
333 pcDNA3.1 expression vector with 2xHA tag at the C terminus. The reporter vector pDM628-luc-RRE was kindly  
334 provided by Dr. Zhang Hui from the Zhongshan School of Medicine, Sun Yat-sen University. The recombinant  
335 plasmid pDM628-luc-4xCTE was constructed by replacing the RRE of the vector pDM628-luc-RRE with four  
336 copies of the Constitutive Transport Element (CTE) of the type D Mason-Pfizer monkey virus (MPMV)  
337 (4xCTE)[61]. The pcDNA3.1-Rev-HA plasmid was provided by Dr. Wang Jianhua from the Institute Pasteur of  
338 Shanghai, Chinese Academy of Sciences.

339 The plasmids of pCAGGS-ANP32A-VN-FLAG, pCAGGS-ANP32A-FLAG-VC, pcDNA3.1-HA-Rev-VC,  
340 pcDNA3.1-HA-Rev-VN, pcDNA3.1-CRM1-VN-HA were constructed by fusing the N-terminal residues 2-173 of  
341 Venus (VN) and C-terminal residues 174-239 (VC) to the C-terminus of ANP32A, Rev or CRM1. The VN was  
342 inserted into pCAGGS-ANP32A-VN-FLAG and pcDNA3.1-CRM1-VN-HA between gene and HA or FLAG tags.  
343 The VC was inserted into pCAGGS-ANP32A-FLAG followed by a FLAG tag. While the pcDNA3.1-HA-Rev-VN  
344 and pcDNA3.1-HA-Rev-VC was constructed by inserting the VN or VC followed the rev gene sequence.

## 345 **VSV-G-pseudotyped retrovirus production**

346 Pseudotyped viruses of HIV-1 were produced by transfection of viral genome constructs in HEK293T cells as  
347 described previously[60]. In brief, for rescue of the HIV-1 pseudovirions, HEK293T cells were seeded in 100-  
348 mm dishes and transfected with NL-Luc- $\Delta$ Env and vesicular stomatitis virus glycoprotein (VSV-G) using the  
349 PEI transfection reagent (Polysciences) following the manufacturer's instruments. Forty-eight hours later, the  
350 culture supernatants were collected clarified by low-speed centrifugation and then were centrifuged at 25,000  
351 rpm at 4 °C for 2 h using a Beckman SW-41T rotor. Viral pellets were resuspended in lysis buffer and subjected  
352 to Western blotting analysis.

## 353 **Cell fraction and real-time PCR analysis**

354 WT and DKO cells were seeded into 6-well plates and infected with HIV-1<sub>NL4-3</sub> pseudotyped virus for 24 h. To  
355 measure viral reverse transcripts, virus stocks were first treated with 50 units/ml RQ1-DNase (Promega) for 1

h to remove any plasmid DNA. Both WT and DKO cells were incubated at 37 °C with these viruses. Cells were collected at 2, 6, and 18 h post infection and the total cellular DNA was extracted using DNeasy kits (Qiagen). Equal amounts of cellular DNA after a further treatment with *Dpn* I were then subjected to real-time PCR in order to measure early and late viral reverse transcripts, as described previously [62].  $\beta$ -globin DNA was measured as an endogenous control. To quantify the mRNA in the WT and DKO cells, total RNA from the cells was extracted using a Bio-fast simply P RNA extraction kit (catalog # BSC60S1, Bioer). Nuclear and cytoplasmic RNA fractions were purified with equal volume of elution buffer by using a PARIS Protein and RNA isolation kit (Ambion, Life Technologies) following the manufacturer's instructions. Equal volume RNA was reverse transcribed into cDNA using the PrimeScript RT Reagent Kit with gDNA Eraser (Takara) according to the manufacturer's instructions. Real-time PCR was performed using the SYBR green PCR mixture to calculate the relative expression of unspliced RNA (*gag*) and completely spliced RNA (*tat*). The primers used are as follows: Gag-forward, 5-GTGTGGAAAATCTCTAGCAGTGG-3, Gag-reverse, 5-CGCTCTCGCACCCATCTC-3 [53]; Tat-forward, 5- CAGCCTAAACTGCTTGTAC-3, Tat-reverse, 5-GGAGGTGGGTTGCTTTGATA-3.

### **Formaldehyde cross-linking, Co-immunoprecipitation and Western Blotting**

To examine the interactions between proteins in cells, HEK293T cells were transfected with the indicated plasmids using the PEI transfection reagent. Immunoprecipitations were performed using an anti-HA affinity gel (catalog NO. A2095; Sigma-Aldrich) following the manufacturer's instructions. Briefly, cells co-transfected with indicated plasmids were harvested after 48 h and washed with PBS. Formaldehyde cross-linking was subsequently performed. Firstly, cells were crosslinked with 1% formaldehyde for 20 min at RT and quenched by the addition of 0.25M glycine for 5 min. Then the cells were lysed with lysis buffer containing protease inhibitor cocktail (catalog NO. P8340; Sigma-Aldrich), sonicated and centrifuged at 13,000 g for 10 min. 30  $\mu$ l of the anti-HA affinity gel was washed with ice-cold PBS and incubated with the cell lysates overnight at 4°C. Following the incubation, beads were washed with lysis buffer, and bound proteins were eluted by mixing and heating the beads in sample loading buffer for 5 min at 98°C. Samples were loaded on a 12% Tris gel (Bio-Rad). The gels were transferred to nitrocellulose membranes and blocked with 5% nonfat dry milk (NFDM) for 1 h and incubated with the appropriate primary antibodies. After extensive washing with TBST, the gels were

further incubated with the relevant secondary antibody for 1 h at RT. Target protein bands were detected and analysis performed using Licor Odyssey (USA).

### **Confocal imaging**

HeLa cells were seeded onto 35-mm glass-bottomed culture dishes (Eppendorf) and then co-transfected with the indicated plasmids. Thirty-six hours later, the dishes were washed with ice-cold PBS (PH 7.6) and the cells were fixed with 4% para-formaldehyde for 30 min at RT. The dishes were then washed with PBS three times and subsequently permeabilized in 0.1% Triton X-100 solution for 15 min at RT. The cells were then treated with 5% BSA blocking solution for 1 h and the incubated with mouse monoclonal anti-HA (Sigma) antibody and rabbit anti-Flag antibody (Sigma) solution for 1 h at RT. The secondary mouse conjugated antibody to Alexa Fluor 488 and secondary rabbit conjugated antibody to Alexa Fluor 633 (Thermo) were subsequently added and incubated for a further 1 h, followed by washing with PBS three times. DAPI (Beyotime, China) staining was performed to visualize nuclei. Stained sections were captured and processed by fluorescence microscopy (ZEISS, LSM880, Germany).

### **RNA in situ hybridization (RNA ISH)**

Locations of target mRNA were detected by ISH using the RNA-Scope Multiplex Fluorescent Reagent Kit v2 (Advanced Cell Diagnostics) according to the manufacturer's instructions. In brief, HEK293T cells were cultured on cell imaging Dishes 35\*10mm (Eppendorf) and transfected. Twenty-four hours later, the cells were fixed with 4% para-formaldehyde for 30 min and permeabilized for 15 min. The cells were then incubated in the HybEZ™ Oven for 2 h at 40 °C to complete the RNA hybridization step. The *gag-pol* mRNA probe (Advanced Cell Diagnostics, catalog # 317691) and the luciferase mRNA probe (Advanced Cell Diagnostics, catalog # 313401) were designed and synthesized by Advanced Cell Diagnostics, and consisted of 20 pairs of oligonucleotides of the target mRNA transcript. Following proprietary preamplification and amplification steps, target mRNAs were labeled with certain fluorescence. DAPI staining was performed to visualize nuclei. Stained sections were captured and processed by fluorescence microscopy (ZEISS, LSM880, Germany).

### **Statistical Analysis**



All experiments were performed independently at least three times, with a representative experiment being shown. All statistical analyses were performed in the GraphPad Prism using student's t test for pairwise and one-way analysis of variance (ANOVA) for multiple comparisons. \* $p < 0.05$ , \*\* $p < 0.01$ , \*\*\* $p < 0.001$ , \*\*\*\* $p < 0.0001$ , NS, not significant ( $p > 0.05$ ).

## Acknowledgements

The authors wish to thank W. Barclay, Dr. Hui Zhang, Dr. Yong-Hui Zheng, and Dr. Jianhua Wang for provision of the plasmids.

## References

1. Cullen BR (1998) Retroviruses as model systems for the study of nuclear RNA export pathways. *Virology* 249: 203-210.
2. Pollard VW, Malim MH (1998) The HIV-1 Rev protein. *Annu Rev Microbiol* 52: 491-532.
3. Hammarskjöld ML, Heimer J, Hammarskjöld B, Sangwan I, Albert L, et al. (1989) Regulation of human immunodeficiency virus env expression by the rev gene product. *J Virol* 63: 1959-1966.
4. Chang DD, Sharp PA (1989) Regulation by HIV Rev depends upon recognition of splice sites. *Cell* 59: 789-795.
5. Emerman M, Vazeux R, Peden K (1989) The rev gene product of the human immunodeficiency virus affects envelope-specific RNA localization. *Cell* 57: 1155-1165.
6. Felber BK, Hadzopoulou-Cladaras M, Cladaras C, Copeland T, Pavlakis GN (1989) rev protein of human immunodeficiency virus type 1 affects the stability and transport of the viral mRNA. *Proc Natl Acad Sci U S A* 86: 1495-1499.
7. Suhasini M, Reddy TR (2009) Cellular proteins and HIV-1 Rev function. *Curr HIV Res* 7: 91-100.
8. Malim MH, Bohnlein S, Hauber J, Cullen BR (1989) Functional dissection of the HIV-1 Rev trans-activator--derivation of a trans-dominant repressor of Rev function. *Cell* 58: 205-214.
9. Malim MH, Hauber J, Le SY, Maizel JV, Cullen BR (1989) The HIV-1 rev trans-activator acts through a structured target sequence to activate nuclear export of unspliced viral mRNA. *Nature* 338: 254-257.
10. Malim MH, Cullen BR (1991) HIV-1 structural gene expression requires the binding of multiple Rev monomers to the viral RRE: implications for HIV-1 latency. *Cell* 65: 241-248.
11. Cullen BR (2003) Nuclear mRNA export: insights from virology. *Trends Biochem Sci* 28: 419-424.
12. Fornerod M, Ohno M, Yoshida M, Mattaj IW (1997) CRM1 is an export receptor for leucine-rich nuclear export signals. *Cell* 90: 1051-1060.
13. Neville M, Stutz F, Lee L, Davis LI, Rosbash M (1997) The importin-beta family member Crm1p bridges the interaction between Rev and the nuclear pore complex during nuclear export. *Curr Biol* 7: 767-775.
14. Dayton AI (2011) Matrin 3 and HIV Rev regulation of mRNA. *Retrovirology* 8: 62.

15. Frohlich A, Rojas-Araya B, Pereira-Montecinos C, Dellarossa A, Toro-Ascuy D, et al. (2016) DEAD-box RNA helicase DDX3 connects CRM1-dependent nuclear export and translation of the HIV-1 unspliced mRNA through its N-terminal domain. *Biochim Biophys Acta* 1859: 719-730.
16. Zhou X, Luo J, Mills L, Wu S, Pan T, et al. (2013) DDX5 facilitates HIV-1 replication as a cellular co-factor of Rev. *PLoS One* 8: e65040.
17. Huang F, Zhang J, Zhang Y, Geng G, Liang J, et al. (2015) RNA helicase MOV10 functions as a co-factor of HIV-1 Rev to facilitate Rev/RRE-dependent nuclear export of viral mRNAs. *Virology* 486: 15-26.
18. Modem S, Badri KR, Holland TC, Reddy TR (2005) Sam68 is absolutely required for Rev function and HIV-1 production. *Nucleic Acids Res* 33: 873-879.
19. Budhiraja S, Liu H, Couturier J, Malovannaya A, Qin J, et al. (2015) Mining the human complexome database identifies RBM14 as an XPO1-associated protein involved in HIV-1 Rev function. *J Virol* 89: 3557-3567.
20. Edgcomb SP, Carmel AB, Naji S, Ambrus-Aikelin G, Reyes JR, et al. (2012) DDX1 is an RNA-dependent ATPase involved in HIV-1 Rev function and virus replication. *J Mol Biol* 415: 61-74.
21. Hammond JA, Zhou L, Lamichhane R, Chu HY, Millar DP, et al. (2018) A Survey of DDX21 Activity During Rev/RRE Complex Formation. *J Mol Biol* 430: 537-553.
22. Yedavalli VS, Neuveut C, Chi YH, Kleiman L, Jeang KT (2004) Requirement of DDX3 DEAD box RNA helicase for HIV-1 Rev-RRE export function. *Cell* 119: 381-392.
23. Toro-Ascuy D, Rojas-Araya B, Garcia-de-Gracia F, Rojas-Fuentes C, Pereira-Montecinos C, et al. (2018) A Rev-CBP80-eIF4AI complex drives Gag synthesis from the HIV-1 unspliced mRNA. *Nucleic Acids Res*.
24. Fukuda M, Asano S, Nakamura T, Adachi M, Yoshida M, et al. (1997) CRM1 is responsible for intracellular transport mediated by the nuclear export signal. *Nature* 390: 308-311.
25. Zemp I, Kutay U (2007) Nuclear export and cytoplasmic maturation of ribosomal subunits. *FEBS Lett* 581: 2783-2793.
26. Verheggen C, Bertrand E (2012) CRM1 plays a nuclear role in transporting snoRNPs to nucleoli in higher eukaryotes. *Nucleus* 3: 132-137.
27. Mathew C, Ghildyal R (2017) CRM1 Inhibitors for Antiviral Therapy. *Front Microbiol* 8: 1171.
28. Reilly PT, Yu Y, Hamiche A, Wang L (2014) Cracking the ANP32 whips: important functions, unequal requirement, and hints at disease implications. *Bioessays* 36: 1062-1071.
29. Brennan CM, Gallouzi IE, Steitz JA (2000) Protein ligands to HuR modulate its interaction with target mRNAs in vivo. *J Cell Biol* 151: 1-14.
30. Chen S, Li B, Grundke-Iqbal I, Iqbal K (2008) I1PP2A affects tau phosphorylation via association with the catalytic subunit of protein phosphatase 2A. *J Biol Chem* 283: 10513-10521.
31. Matilla A, Koshy BT, Cummings CJ, Isobe T, Orr HT, et al. (1997) The cerebellar leucine-rich acidic nuclear protein interacts with ataxin-1. *Nature* 389: 974-978.
32. Tochio N, Umehara T, Munemasa Y, Suzuki T, Sato S, et al. (2010) Solution structure of histone chaperone ANP32B: interaction with core histones H3-H4 through its acidic concave domain. *J Mol Biol* 401: 97-114.
33. de Chiara C, Kelly G, Frenkiel TA, Pastore A (2007) NMR assignment of the leucine-rich repeat domain of LANP/Anp32a. *J Biomol NMR* 38: 177.
34. Pan W, da Graca LS, Shao Y, Yin Q, Wu H, et al. (2009) PHAPI/pp32 suppresses tumorigenesis by stimulating apoptosis. *J Biol Chem* 284: 6946-6954.
35. Schneider R, Bannister AJ, Weise C, Kouzarides T (2004) Direct binding of INHAT to H3 tails disrupted by modifications. *J Biol Chem* 279: 23859-23862.
36. Li M, Makkinje A, Damuni Z (1996) Molecular identification of I1PP2A, a novel potent heat-stable inhibitor protein of protein phosphatase 2A. *Biochemistry* 35: 6998-7002.
37. Seo SB, Macfarlan T, McNamara P, Hong R, Mukai Y, et al. (2002) Regulation of histone acetylation and transcription by nuclear protein pp32, a subunit of the INHAT complex. *J Biol Chem* 277: 14005-14010.

38. Long JS, Giotis ES, Moncorgé O, Frise R, Mistry B, et al. (2016) Species difference in ANP32A underlies influenza A virus polymerase host restriction. *Nature* 529: 101-104.
39. Sugiyama K, Kawaguchi A, Okuwaki M, Nagata K (2015) pp32 and APRIL are host cell-derived regulators of influenza virus RNA synthesis from cRNA. *eLife* 4: e08939.
40. Bodem J, Schied T, Gabriel R, Rammling M, Rethwilm A (2010) Foamy Virus Nuclear RNA Export Is Distinct from That of Other Retroviruses. *Journal of Virology* 85: 2333-2341.
41. Fries B, Heukeshoven J, Hauber I, Gruttner C, Stocking C, et al. (2007) Analysis of nucleocytoplasmic trafficking of the HuR ligand APRIL and its influence on CD83 expression. *J Biol Chem* 282: 4504-4515.
42. Wiczer BM, Bernlohr DA (2009) A novel role for fatty acid transport protein 1 in the regulation of tricarboxylic acid cycle and mitochondrial function in 3T3-L1 adipocytes. *J Lipid Res* 50: 2502-2513.
43. Sutherland BW, Toews J, Kast J (2008) Utility of formaldehyde cross-linking and mass spectrometry in the study of protein-protein interactions. *J Mass Spectrom* 43: 699-715.
44. Ulitzur N, Rancano C, Pfeffer SR (1997) Biochemical characterization of mapmodulin, a protein that binds microtubule-associated proteins. *J Biol Chem* 272: 30577-30582.
45. Sun Q, Carrasco YP, Hu Y, Guo X, Mirzaei H, et al. (2013) Nuclear export inhibition through covalent conjugation and hydrolysis of Leptomycin B by CRM1. *Proc Natl Acad Sci U S A* 110: 1303-1308.
46. Mann DA, Mikaelian I, Zimmel RW, Green SM, Lowe AD, et al. (1994) A molecular rheostat. Co-operative rev binding to stem I of the rev-response element modulates human immunodeficiency virus type-1 late gene expression. *J Mol Biol* 241: 193-207.
47. Cullen BR (1992) Mechanism of action of regulatory proteins encoded by complex retroviruses. *Microbiol Rev* 56: 375-394.
48. Matilla A, Radrizzani M (2005) The Anp32 family of proteins containing leucine-rich repeats. *Cerebellum* 4: 7-18.
49. Bauer A, Neumann S, Karger A, Henning AK, Maisner A, et al. (2014) ANP32B is a nuclear target of henipavirus M proteins. *PLoS One* 9: e97233.
50. Zhou H, Xu M, Huang Q, Gates AT, Zhang XD, et al. (2008) Genome-scale RNAi screen for host factors required for HIV replication. *Cell Host Microbe* 4: 495-504.
51. Park RJ, Wang T, Koundakjian D, Hultquist JF, Lamothe-Molina P, et al. (2017) A genome-wide CRISPR screen identifies a restricted set of HIV host dependency factors. *Nat Genet* 49: 193-203.
52. Bogerd HP, Echarri A, Ross TM, Cullen BR (1998) Inhibition of human immunodeficiency virus Rev and human T-cell leukemia virus Rex function, but not Mason-Pfizer monkey virus constitutive transport element activity, by a mutant human nucleoporin targeted to Crm1. *J Virol* 72: 8627-8635.
53. Ren XX, Wang HB, Li C, Jiang JF, Xiong SD, et al. (2016) HIV-1 Nef-associated Factor 1 Enhances Viral Production by Interacting with CRM1 to Promote Nuclear Export of Unspliced HIV-1 gag mRNA. *J Biol Chem* 291: 4580-4588.
54. Ajamian L, Abel K, Rao S, Vyboh K, Garcia-de-Gracia F, et al. (2015) HIV-1 Recruits UPF1 but Excludes UPF2 to Promote Nucleocytoplasmic Export of the Genomic RNA. *Biomolecules* 5: 2808-2839.
55. He JJ, Henao-Mejia J, Liu Y (2009) Sam68 functions in nuclear export and translation of HIV-1 RNA. *RNA Biol* 6: 384-386.
56. Li J, Liu Y, Kim BO, He JJ (2002) Direct participation of Sam68, the 68-kilodalton Src-associated protein in mitosis, in the CRM1-mediated Rev nuclear export pathway. *J Virol* 76: 8374-8382.
57. Kula A, Guerra J, Knezevich A, Kleva D, Myers MP, et al. (2011) Characterization of the HIV-1 RNA associated proteome identifies MatrIn 3 as a nuclear cofactor of Rev function. *Retrovirology* 8: 60.
58. Yedavalli VS, Jeang KT (2011) MatrIn 3 is a co-factor for HIV-1 Rev in regulating post-transcriptional viral gene expression. *Retrovirology* 8: 61.

59. Lamichhane R, Hammond JA, Pauszek RF, 3rd, Anderson RM, Pedron I, et al. (2017) A DEAD-box protein acts through RNA to promote HIV-1 Rev-RRE assembly. *Nucleic Acids Res* 45: 4632-4641.
60. Ji S, Na L, Ren H, Wang Y, Wang X (2018) Equine Myxovirus Resistance Protein 2 Restricts Lentiviral Replication by Blocking Nuclear Uptake of Capsid Protein. *J Virol* 92.
61. Bray M, Prasad S, Dubay JW, Hunter E, Jeang KT, et al. (1994) A small element from the Mason-Pfizer monkey virus genome makes human immunodeficiency virus type 1 expression and replication Rev-independent. *Proc Natl Acad Sci U S A* 91: 1256-1260.
62. Wang X, Han Y, Dang Y, Fu W, Zhou T, et al. (2010) Moloney leukemia virus 10 (MOV10) protein inhibits retrovirus replication. *J Biol Chem* 285: 14346-14355.

## Figure legends

**Fig 1. ANP32A and ANP32B are indispensable for HIV-1 gag expression and viral production.** (A) Schematic diagram of sequence analysis and secondary structure comparison of human ANP32A and ANP32B. (B) A schematic of ANP32A and ANP32B KO by CRISPR/Cas9 technology. The position of each sgRNA is depicted with yellow. (C) Verification of ANP32A, ANP32B, and actin expression by Western blotting in WT, AKO, BKO and DKO cells. (D) The transcription levels of ANP32A and  $\beta$ -actin were quantified using real-time PCR in the WT, AKO, BKO and DKO cells. Error bars represent standard deviation calculated from three experiments (\*\*p < 0.001, NS, not significant). (E) The transcription levels of ANP32B and  $\beta$ -actin were quantified using real-time PCR in the WT, AKO, BKO and DKO cells. Error bars represent standard deviation calculated from three experiments (\*\*p < 0.001, NS, not significant). (F) Gag expression in cell lysate and supernatants were identified by Western blotting. WT, AKO, BKO and DKO cells were transfected with pNL4-3-luc $\Delta$ Vif $\Delta$ Env and VSV-G-expressing plasmids. Virions were purified from cell culture supernatants by ultracentrifugation 48 h post-transfection. Cells and virions were lysed and analyzed by Western blotting with the appropriate primary antibodies, including a mouse monoclonal anti-P24 antibody (Sino Biological), Rabbit Polyclonal VSV-G tag antibody (GeneTex) and a mouse anti  $\beta$ -actin antibody (Sigma). (G) Rescue of p24 and p55 expression in the stable expressing ANP32A or ANP32B protein DKO cells. DKO, DKO+A or DKO+B were transfected with pNL4-3-luc $\Delta$ Vif $\Delta$ Env and VSV-G plasmids and HIV-1 production was quantified by measuring p24 expression 48 h later in cell lysates and cell culture supernatants. (H-I) Increasing amounts of human ANP32A (H) or human ANP32B (I) expression vectors, and virion protein expression in cells and culture supernatants were detected by Western blotting.

**Fig 2. ANP32A and ANP32B enhance the export of unspliced mRNA from nucleus to cytoplasm.** Both WT and DKO cells were infected with HIV-1 pseudotype virus. (A, B) Levels of accumulation of viral reverse transcripts. HIV-1 pseudotype virions were first treated with DNase and then used to infect WT and DKO cells. 2, 6, and 18 h later, cellular DNAs were extracted from these infected cells, and the viral early (A) and late reverse transcripts (B) were quantified by real-time PCR using specific primers and probes. Globin mRNA was measured as an endogenous control. (C) Total RNA was extracted from transfected cells and analyzed by real-time PCR using primers specific for unspliced mRNA.  $\beta$ -actin mRNA was measured as an endogenous control.

(D) Cytoplasmic and nuclear RNAs isolated from WT and DKO cells at 12, 24 h post infection was analyzed by real-time PCR with primers specific for unspliced mRNA. (E) Cytoplasmic and nuclear unspliced *gag* RNAs distribution in the WT and DKO cells at the 24 h post infection. (F) Cytoplasmic and nuclear completely spliced *tat* RNAs distribution in the WT and DKO cells at the 24 h post infection. (G) Lamin-B1 and tubulin was used as nuclear or cytoplasmic control, respectively. Data indicate means and error bars indicate  $\pm$ SEM (N=4). \* $p < 0.05$ , \*\*\* $p < 0.001$ , NS, not significant ( $p > 0.05$ ).

**Fig 3. ANP32A and ANP32B double depletion reduces the levels of unspliced HIV-1 mRNA in the cytoplasm.** (A) WT cells were infected with the HIV-1 pseudotype virus for 24 h and cells were fixed, and stained with fluorescent *gag-pol*-specific RNA probes. DAPI staining was performed to visualize nuclei. Stained sections were captured and processed using fluorescence microscopy (ZEISS, LSM880, Germany). (B) DKO cells were infected with the HIV-1 pseudotype virus for 24 h and cells were fixed and stained with fluorescent *gag-pol*-specific RNA probes. DAPI staining was performed to visualize nuclei. Stained sections were captured and processed using fluorescence microscopy (ZEISS, LSM880, Germany). (C) WT cells were infected with the HIV-1 pseudotype virus for 24 h and cells were fixed, stained with fluorescent *gag-pol*-specific RNA probes. DAPI staining was performed to visualize nuclei. Stained sections were captured and processed using the Delta vision OMX SR imaging system (GE). (D) DKO cells were infected with the HIV-1 pseudotype virus for 24 h and cells were fixed, stained with fluorescent *gag-pol*-specific RNA probes. DAPI staining was performed to visualize nuclei. Stained sections were captured and processed using the Delta vision OMX SR imaging system (GE).

**Fig 4. ANP32A and ANP32B support the transport of Rev/RRE-dependent, but not CTE-dependent reporter genes.** (A) Schematic diagram of the pDM628-luc-RRE and pDM628-luc-4xCTE luciferase reporter system. (B) Analysis of the difference in amounts of pDM628-luc-RRE luciferase mRNA between WT and DKO cells. WT or DKO cells were co-transfected with pDM628-luc-RRE-luc and Rev-HA, and 24 h later total RNA was extracted from transfected cells and analyzed with real time PCR using primers specific to luciferase mRNA.  $\beta$ -actin mRNA was measured as an endogenous control. (C) Analysis of the difference in amounts of pDM628-luc-4xCTE luciferase mRNA between WT and DKO cells. WT or DKO cells were co-transfected with pDM628-luc-4xCTE-luc and Rev-HA, and 24 h later total RNA was extracted from transfected cells and analyzed with



real time PCR by primers specific to luciferase mRNA.  $\beta$ -actin mRNA was measured as an endogenous control. (D) WT or DKO cells were co-transfected with pDM628-luc-RRE and Rev-HA. 24 h later cytoplasmic and nuclear RNA was extracted from transfected cells and analyzed with real time PCR by primers specific to luciferase mRNA. (E) WT or DKO cells were co-transfected with pDM628-luc-4xCTE and Rev-HA. 24 h later cytoplasmic and nuclear RNA was extracted from transfected cells and analyzed by real time PCR using primers specific to luciferase mRNA. (F) WT or DKO cells were co-transfected with Rev-HA and pDM628-luc-RRE or pDM628-luc-4xCTE plasmids for 24 h and cells were fixed, stained with a fluorescent luciferase-specific RNA probe. DAPI staining was performed to visualize nuclei. Stained sections were captured and processed using fluorescence microscopy (ZEISS, LSM880, Germany). Data indicate means and error bars indicate  $\pm$ SEM (N=4). NS, not significant ( $p > 0.05$ ).

**Fig 5. ANP32A and ANP32B interact with Rev. (A) Detection of ANP32A and ANP32B interactions with Rev.** HEK293T cells were co-transfected with plasmids expressing ANP32A-Flag or ANP32B-Flag alone or in the presence of Rev-HA vector, the whole-cell lysates were prepared, and immunoprecipitations were performed with anti-HA beads and analyzed by Western blotting. (B) A schematic of the BiFC fusion proteins is presented. Venus is divided into an N-terminal region from residues 2 to 173 (VN) and a C-terminal region from residues 174 to 239 (VC). VN and VC were fused to the C-terminus of the target proteins. (C) ANP32A-VN-Flag and HA-Rev-VC were expressed individually in 293T cells and ANP32A-VN-Flag and HA-Rev-VC fusion proteins were stained with a rabbit anti-Flag and anti-HA monoclonal antibody at 1:500 followed by an Alexa-Fluor-647-conjugated goat anti-rabbit antibody at 1:1000 dilution. (D) ANP32A-VN, ANP32A-VC, Rev-VN, Rev-VC pairwise were transfected into 293T cell and the BiFC green fluorescent signals were visualized by confocal microscopy.

**Fig 6. ANP32A and ANP32B play key role in the CRM1 dependent RNA export pathway. (A) Detection of ANP32A interaction with CRM1.** HEK293T cells were co-transfected with plasmids expressing ANP32A-Flag alone or in the presence of the CRM1-HA vector, the whole-cell lysates were prepared, and immunoprecipitations were performed with anti-HA beads and analyzed by Western blotting. (B) HeLa cells were co-transfected with CRM1-HA and ANP32A-Flag or ANP32B-Flag expressing plasmids and



immunofluorescence stained to visualize the nucleus (DAPI), ANP32A-Flag or ANP32B-Flag (red) and CRM1-HA (green). (C) CRM1-VN and ANP32A-VC were co-transfected into HEK293T cells and the BiFC green fluorescent signals were visualized by confocal microscopy. (D) The HEK293T cells were infected with HIV-1 psuedotype virus for 12 h and either medium or LMB (20 nM) (Beyotime) were added for additional 12 h. HIV-1 *gag* mRNA location was analyzed with a specific probe using an RNA Scope technology. (E) ANP32A-VN and Rev-VC were co-transfected into HEK293T cells and either medium or LMB (20 nM) were added for additional 12 h. The BiFC green fluorescent signals were visualized using confocal microscopy. (F) WT and DKO cells were infected with HIV-1 psuedotype virus for 12 h and either medium or LMB (20 nM) were added for additional 12 h. The viral infectivity was determined by measuring luciferase activity. Error bars represent standard deviation calculated from three experiments. \*\*\* $p < 0.001$ , NS, not significant ( $p > 0.05$ ).

**Fig 7. ANP32A/B not disrupt the interaction between Rev and CRM1 protein.** (A) Detection of CRM1 interaction with Rev. 293T WT or DKO cells were co-transfected with plasmids expressing Rev-Flag along or in the presence of CRM1-HA vector, the whole cells lysates were prepared, immunoprecipitations were performed with anti-HA beads, and analyzed by Western blotting. (B) CRM1-VN and Rev-VC were co-transfected into 293T WT and DKO cells and the BiFC green fluorescent signals were visualized by confocal microscopy.

**Fig 8. Proposed model for ANP32A/B function in CRM1-mediated nuclear export.** In the late phase of HIV-1 replication, ANP32A/B interact with Rev/RRE and CRM1 complex and mediated unspliced mRNA nuclear transport via the nuclear pore complex. In the cytoplasm, the complex dissociated and several factors including ANP32A/B recycle back to the nuclear location. The unspliced mRNA translate to the viral protein or assemble virions as the viral RNA.

Wang\_Fig. 1

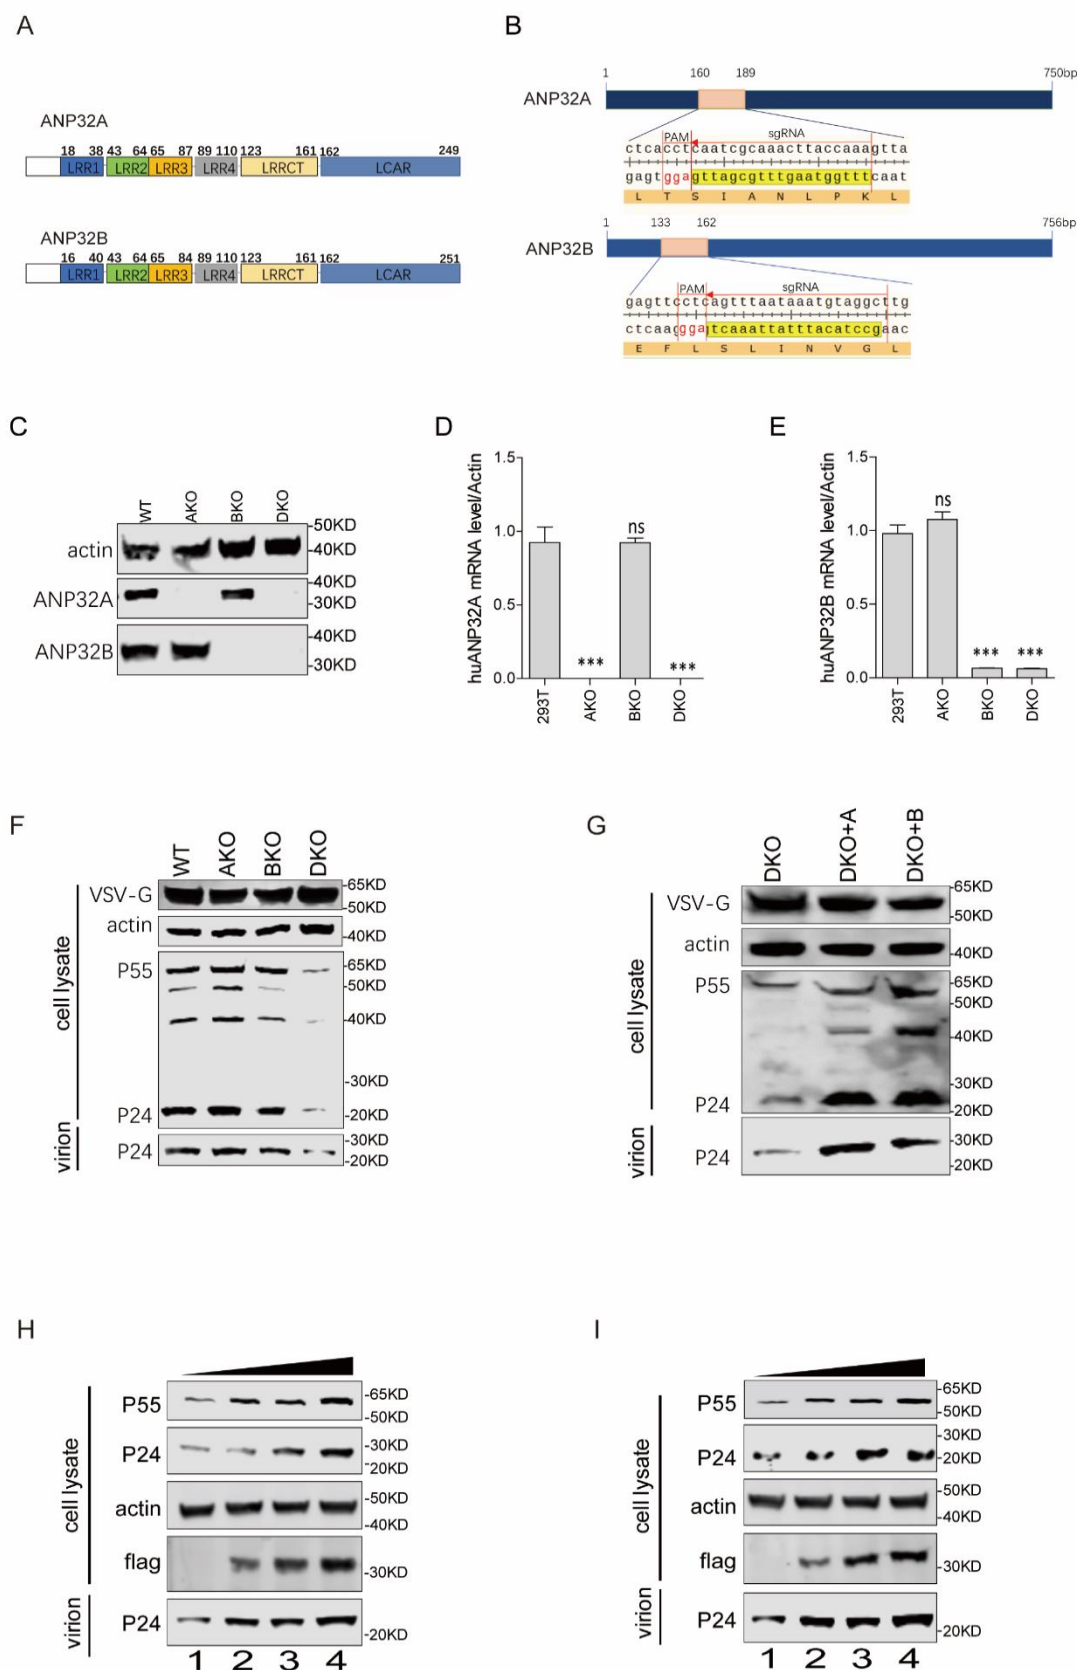

Wang\_Fig. 2

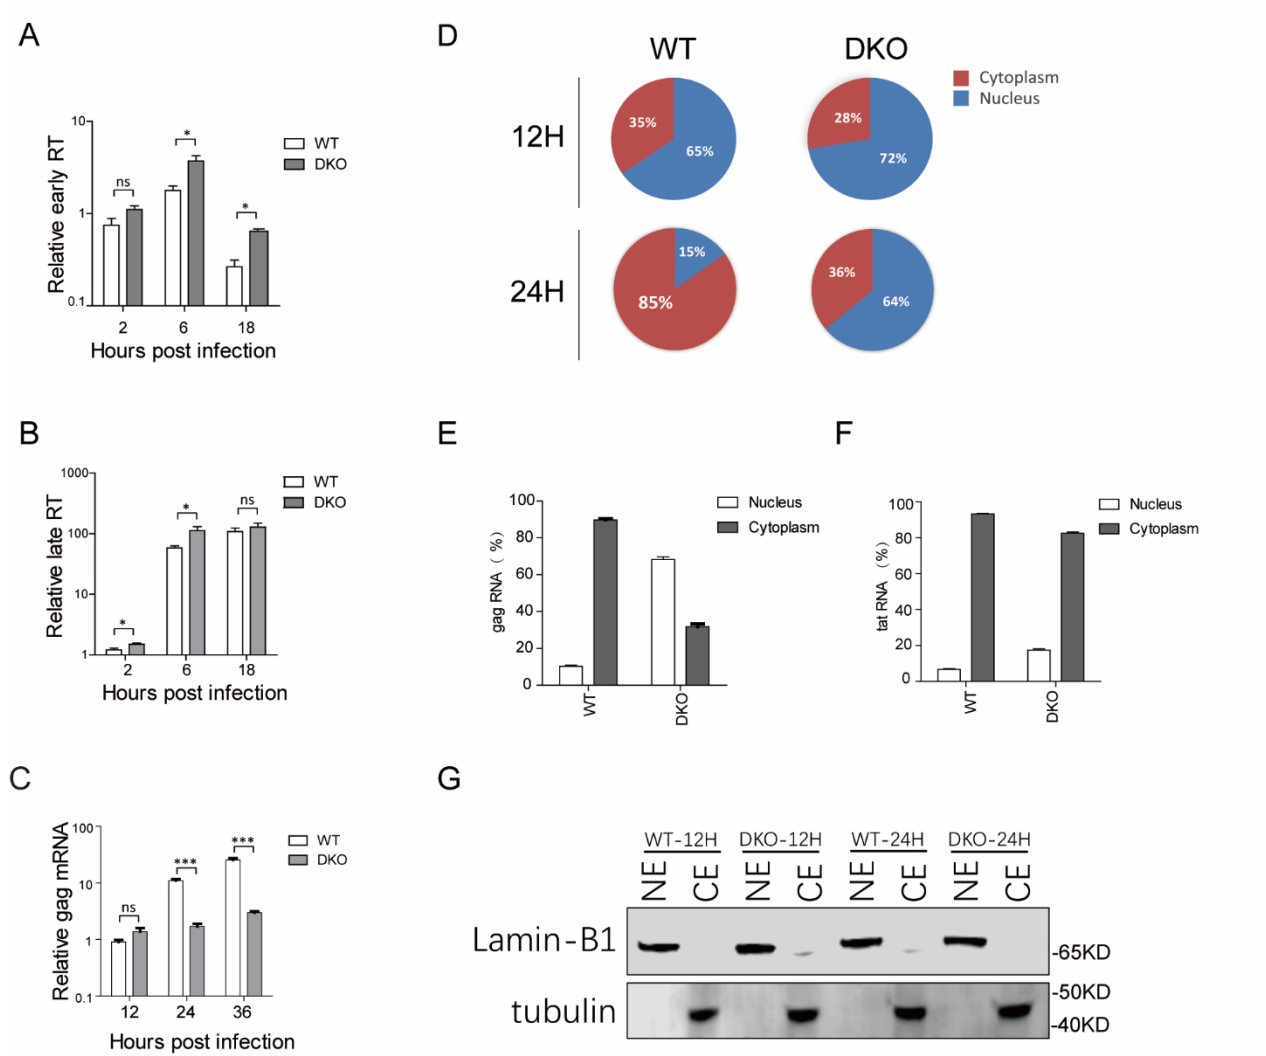

667

Wang\_Fig. 3

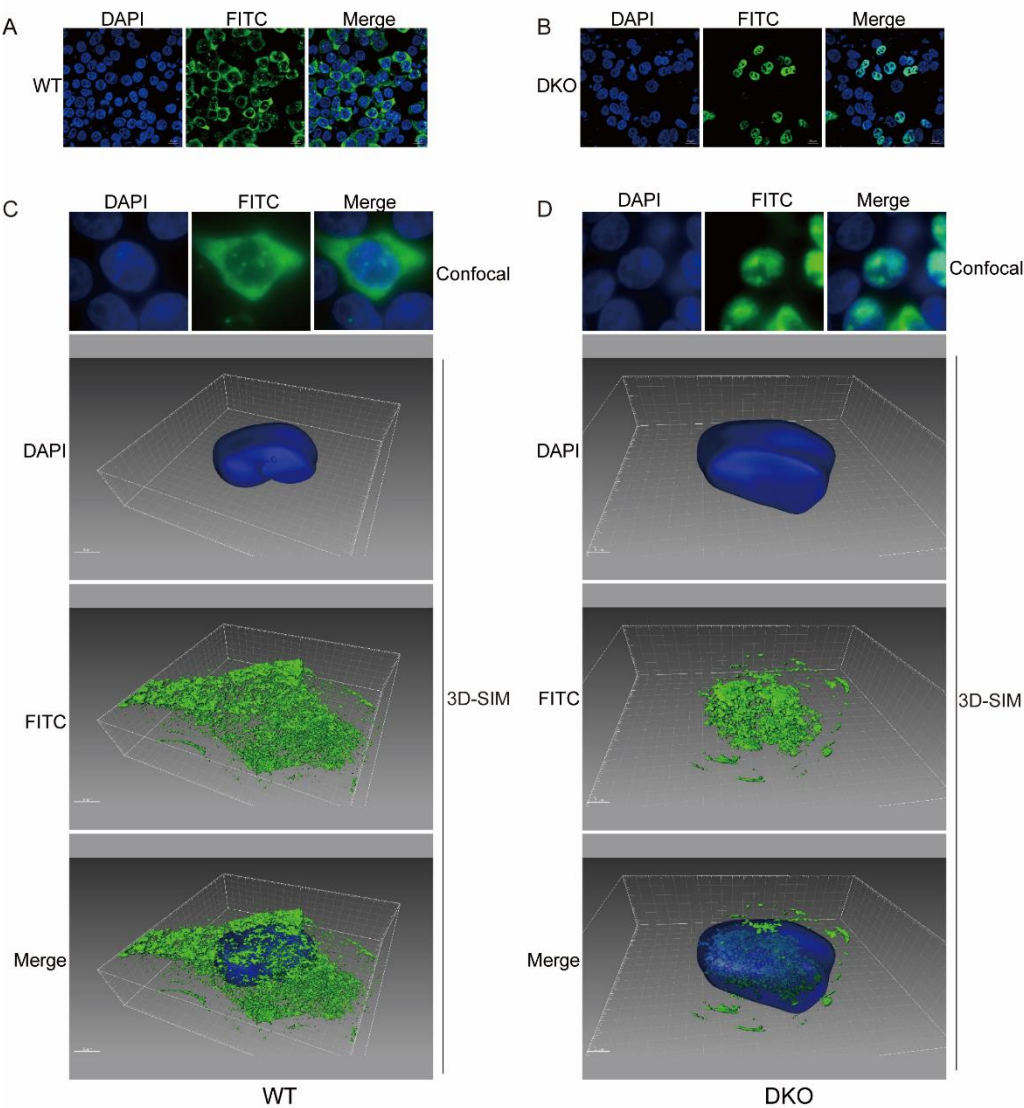

668

669

Wang\_Fig. 4

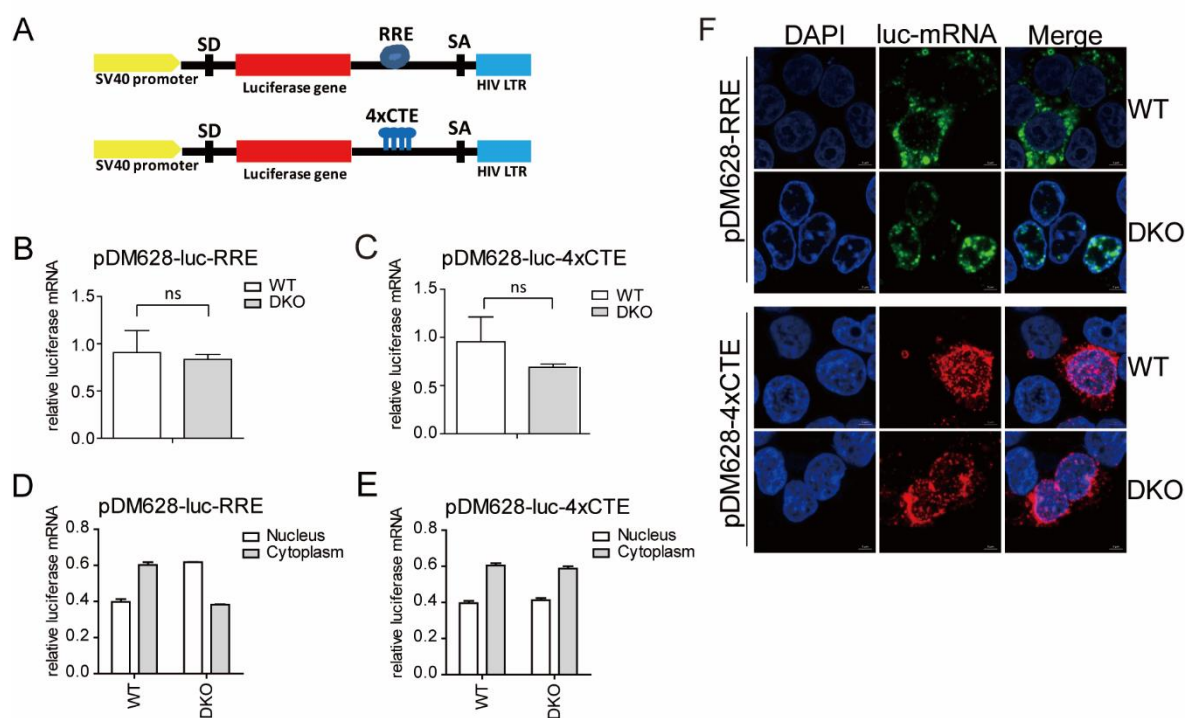

670

671

Wang\_Fig. 5

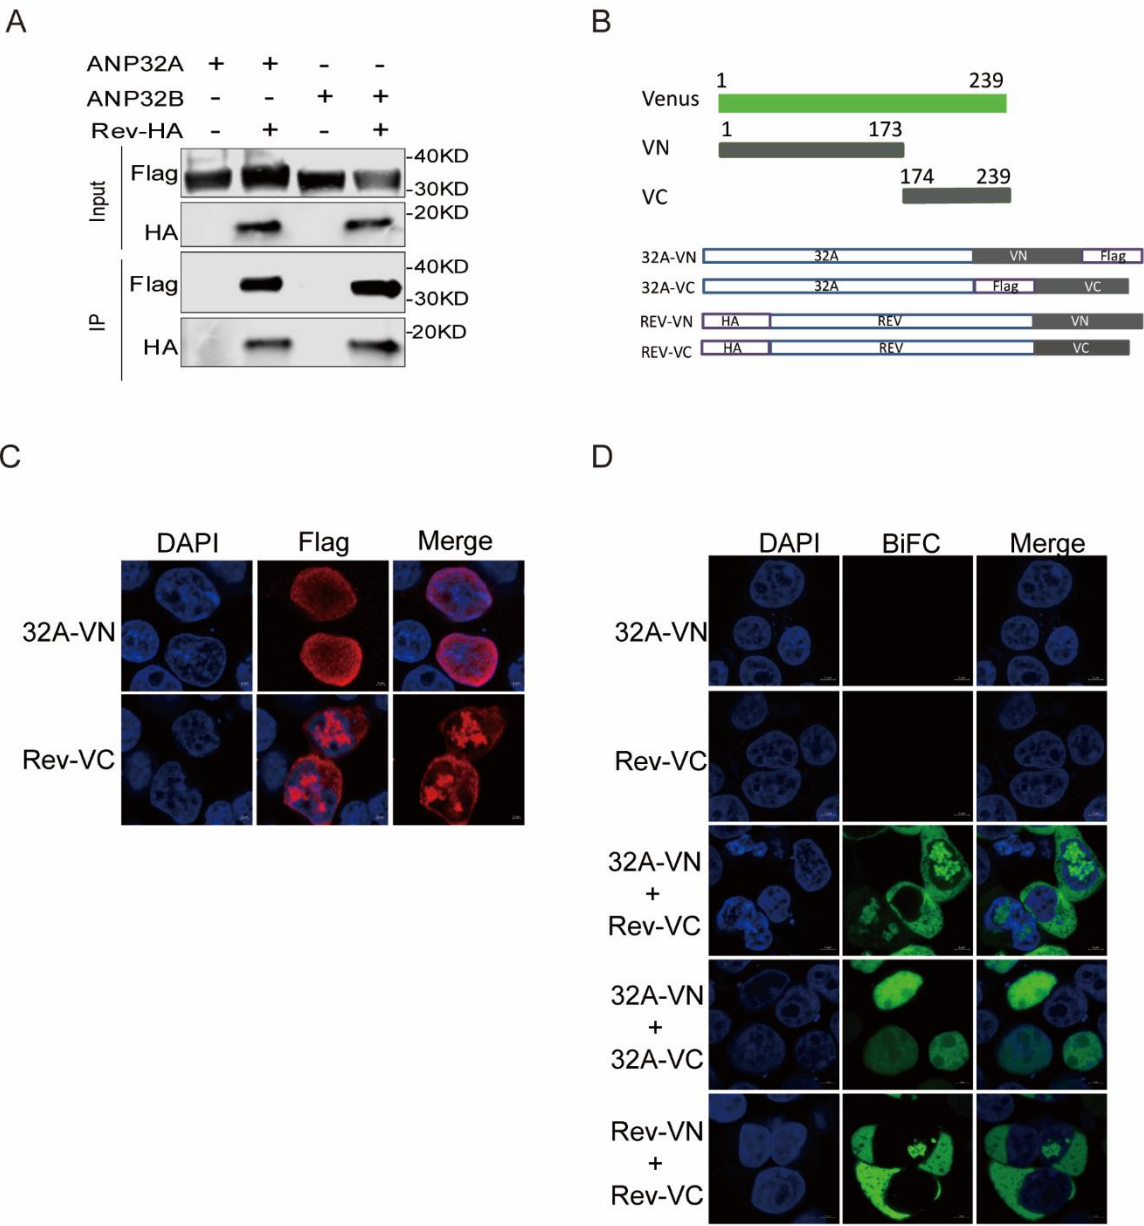



Wang\_Fig. 6

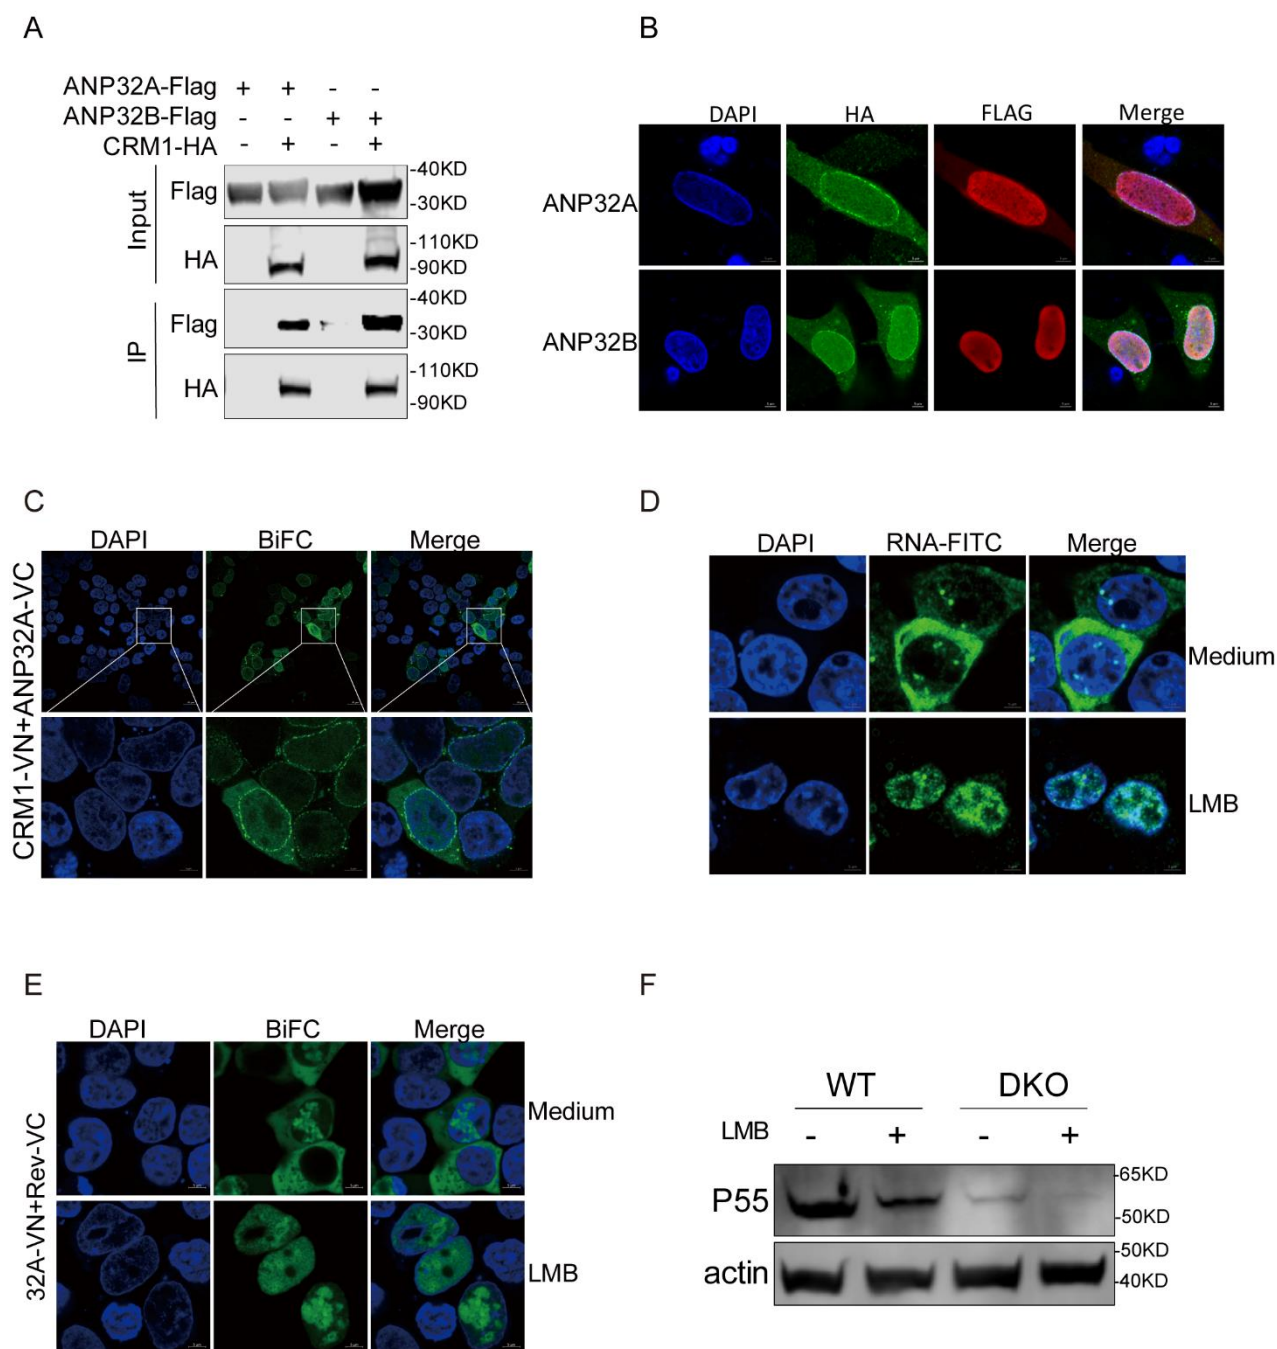



Wang\_Fig. 7

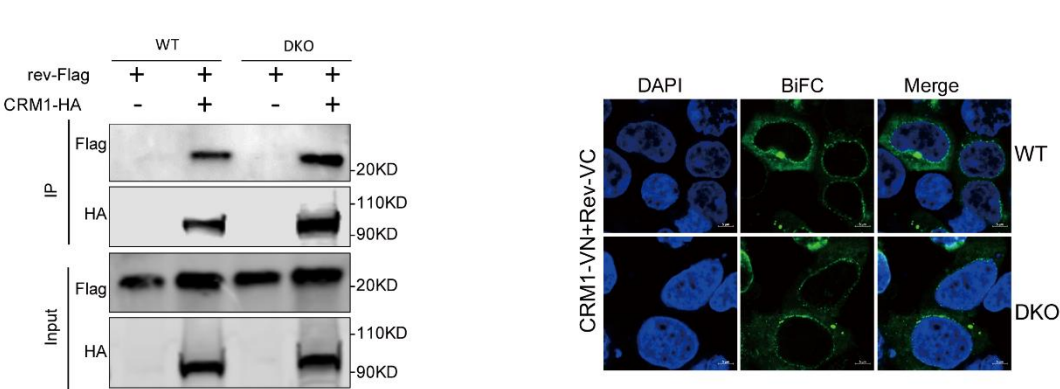

681

Wang\_Fig. 8

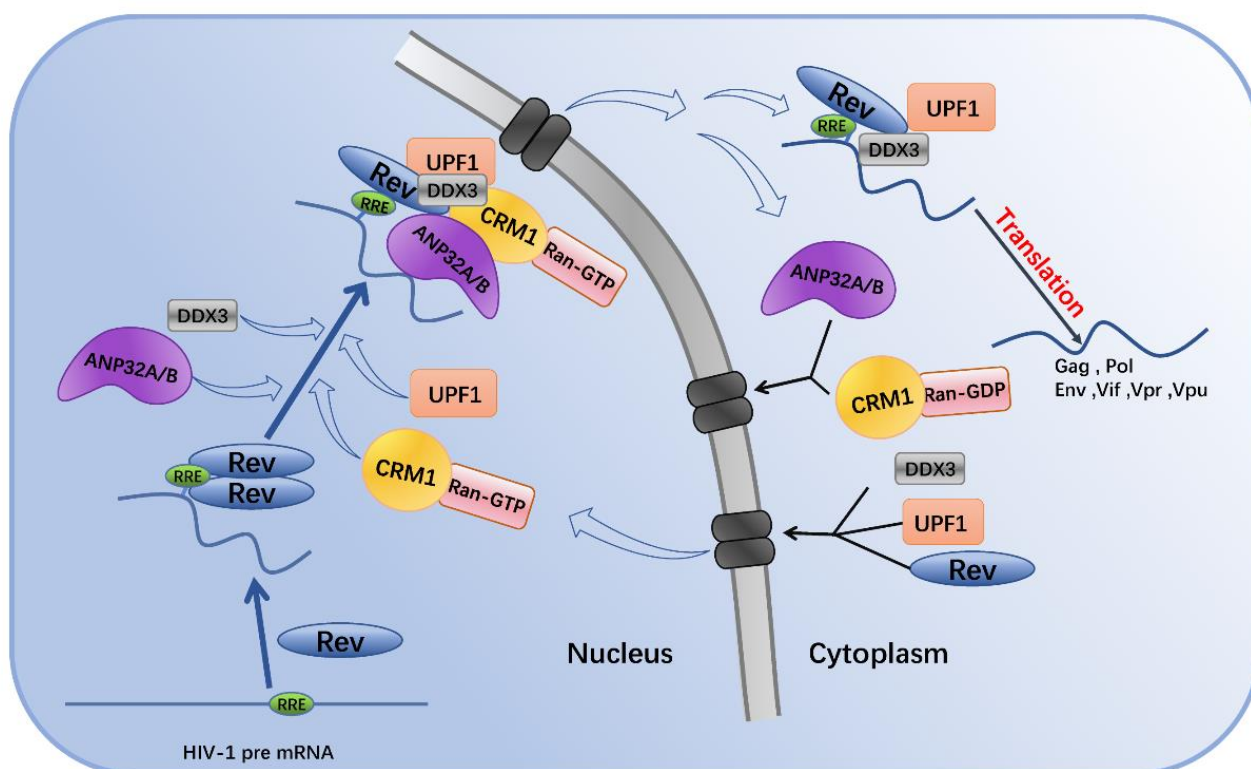

Source: https://www.biorxiv.org/content/10.1101/559096v1.full.pdf
